# Supplementary material
Source: Elsevier journal article supplement (https://www.sciencedirect.com/science/article/pii/S2530064421000547)
Supplement: mmc2 [file S2530064421000547:mmc2.xlsx]

## Sheet: Table S2
Age	Plots	Logged trees				Living trees
		Density	Richness	Biomass	DBH (cm)	Density	Richness	Biomass	DBH (cm)
		(Ind.ha-1)	(Species.ha-1)	(Mg.ha-1)	Mean±SD	(Ind.ha-1)	(Species.ha-1)	(Mg.ha-1)	Mean±SD
Mature forest	MF1	2	1	0.03183	6.63±2.4	1201	94	183.99	12.9±10.5
	MF2	108	23	2.68422	7.92±1.7	1128	87	342.83	15.8±14.3
	MF3	13	6	0.4673	7.99±4.2	1118	65	277.16	14.1±13.2
	MF4	70	25	0.83405	5.80±1.7	656	77	262.41	17.8±15.2
Total		193	41	4.0174		4103	173	1066.39
Mean (per ha)		48.25	13.75	1.00435	7.16±2.3	1025.75	80.75	266.598	14.8±13.3
Late secondary forest	LSF1	11	5	0.18969	6.98±1.4	1688	111	67.43	9.04±4.9
	LSF2	2	2	0.09472	10.6±1.4	1055	50	54.28	9.94±5.6
	LSF3	2	1	0.01014	4.46±0.1	1067	57	46.76	9.69±4.9
Total		15	8	0.29455		3810	146	168.47
Mean (per ha)		5	2.66667	0.0981833	7.12±2.1	1270	72.6667	56.1567	9.48±5.1
Early secondary forest	ESF1	56	20	0.75603	6.08±1.9	921	59	131.36	12.9±9.6
	ESF2	3	1	0.04247	6.60±0.7	586	54	20.16	8.68±4.1
	ESF3	-	-	-	-	91	24	7.51	10.8±7.9
Total		59	20	0.7985		1598	88	159.03
Mean (per ha)		29.5	10.5	0.39925	6.11±1.8	532.667	45.6667	53.01	11.31±8.2
General total		267	55	5.11045	6.93±2.2	9511	265	1393.89	12.2±10.4			2.80728
