# Supplementary material
Source: Elsevier journal article supplement (https://www.sciencedirect.com/science/article/pii/S2530064421000547)
Supplement: mmc3 [file S2530064421000547:mmc3.docx]

**Table S3**. Families and species recorded as stumps (logged trees) and their densities in a chronosequence at the Dois Irmãos State Park (PEDI), Recife, Pernambuco, Brazil. MF, mature forest; LSF, late secondary forest; ESF, early secondary forest.

| **Family**  Species | **MF** | **LSF** | **ESF** | **Total** |
| --- | --- | --- | --- | --- |
| **Anacardiaceae** | **6** | **-** | **6** | **12** |
| *Anacardium occidentale* L. | - | - | 3 | 3 |
| *Tapirira guianensis* Aubl. | 1 | - | 3 | 4 |
| *Thyrsodium spruceanum* Benth. | 5 | - | - | 5 |
| **Apocynaceae** | **2** | **-** | **-** | **2** |
| *Himatanthus phagedaenicus* (Mart.) Woodson | 1 | - | - | 1 |
| *Tabernaemontana coriacea* Link ex Roem. & Schult. | 1 | - | - | 1 |
| **Araliaceae** | **3** | **-** | **-** | **3** |
| *Schefflera morototoni* (Aubl.) Maguire et al. | 3 | - | - | 3 |
| **Burseraceae** | **9** | **-** | **-** | **9** |
| *Protium giganteum* Engl. | 7 | - | - | 7 |
| *Protium heptaphyllum* (Aubl.) Marchand | 2 | - | - | 2 |
| **Celastraceae** | **3** | **-** | **-** | **3** |
| *Maytenus obtusifolia* Mart. | 3 | - | - | 3 |
| **Clusiaceae** | **1** | **-** | **1** | **2** |
| *Clusia nemorosa* G.Mey. | - | - | 1 | 1 |
| *Tovomita brevistaminea* Engl. | 1 | - | - | 1 |
| **Erythroxylaceae** | - | - | 1 | 1 |
| *Erythroxylum citrifolium* A.St.-Hil. | - | - | 1 | 1 |
| **Fabaceae** | **10** | **5** | **2** | **17** |
| *Chamaecrista ensiformis* (Vell.) H.S.Irwin & Barneby | 2 | 1 | - | 3 |
| *Hymenaea courbaril* L. | - | - | 2 | 2 |
| *Hymenaea rubriflora* Ducke | 2 | - | - | 2 |
| *Inga thibaudiana* DC. | 1 | - | - | 1 |
| *Parkia pendula* (Willd.) Benth. ex Walp. | 5 | 4 | - | 9 |
| **Humiriaceae** | **-** | **1** | **-** | **1** |
| *Sacoglottis mattogrossensis* Malme | - | 1 | - | 1 |
| **Hypericaceae** | **-** | **-** | **1** | **1** |
| *Vismia guianensis* (Aubl.) Choisy | - | - | 1 | 1 |
| **Lauraceae** | **8** | **-** | **-** | **8** |
| *Ocotea brachybotrya* (Meisn.) Mez | 1 | - | - | 1 |
| *Ocotea canaliculata* ( Rich.) Mez | 2 | - | - | 2 |
| *Ocotea gardneri* (Meisn.) Mez | 3 | - | - | 3 |
| *Ocotea indecora* (Schott) Mez | 1 | - | - | 1 |
| *Ocotea limae* Vattimo-Gil | 1 | - | - | 1 |
| **Lecythidaceae** | **7** | **-** | **30** | **37** |
| *Eschweilera ovata* (Cambess.) Mart. ex Miers | 7 | - | 29 | 36 |
| *Lecythis pisonis* Cambess. | - | - | 1 | 1 |
| **Malvaceae** | **1** | **-** | **-** | **1** |
| *Eriotheca macrophylla* (K.Schum.) A.Robyns | 1 | - | - | 1 |
| **Melastomataceae** | **33** | **1** | **2** | **36** |
| *Miconia affinis* DC. | 2 | - | - | 2 |
| *Miconia amacurensis* Wurdack DC. | 31 | 1 | 1 | 33 |
| *Miconia minutiflora* (Bonpl.) DC. | - | - | 1 | 1 |
| **Moraceae** | **30** | **1** | **1** | **32** |
| *Brosimum guianense* (Aubl.) Huber | 9 | - | 1 | 10 |
| *Brosimum rubescens* Taub. | 2 | - | - | 2 |
| *Helicostylis tomentosa* (Poepp. & Endl.) Rusby | 19 | 1 | - | 20 |
| **Myrtaceae** | **14** | **1** | **7** | **22** |
| *Eugenia umbrosa* O.Berg | - | - | 1 | 1 |
| *Eugenia uniflora* L. | - | 1 | 1 | 2 |
| *Myrcia guianensis* (Aubl.) DC. | 13 | - | 2 | 15 |
| *Myrcia spectabilis* DC. | - | - | 3 | 3 |
| *Myrcia sylvatica* (G.Mey.) DC. | 1 | - | - | 1 |
| **Peraceae** | **29** | **4** | **1** | **34** |
| *Pera glabrata* (Schott) Baill. | - | - | 1 | 1 |
| *Pogonophora schomburgkiana* Miers ex Benth. | 29 | 4 | - | 33 |
| **Phyllanthaceae** | **1** | **-** | **-** | **1** |
| *Richeria grandis* Vahl | 1 | - | - | 1 |
| **Primulaceae** | **-** | **-** | **1** | **1** |
| *Myrsine guianensis* (Aubl.) Kuntze | - | - | 1 | 1 |
| **Rubiaceae** | **1** | **-** | **-** | **1** |
| *Rudgea umbrosa* Müll.Arg. | 1 | - | - | 1 |
| **Salicaceae** | **4** | **-** | **1** | **5** |
| *Casearia javitensis* Kunth | 2 | - | 1 | 3 |
| *Casearia sylvestris* Sw. | 2 | - | - | 2 |
| **Sapindaceae** | **3** | **2** | **1** | **6** |
| *Cupania oblongifolia* Mart. | 2 | - | - | 2 |
| *Talisia macrophylla* (Mart.) Radlk. | 1 | 2 | - | 3 |
| *Talisia retusa* R.S. Cowan | - | - | 1 | 1 |
| **Sapotaceae** | **15** | **-** | **-** | **15** |
| *Pouteria bangii* (Rusby) T.D. Penn. | 3 | - | - | 3 |
| *Pouteria gardneriana* (A.DC.) Radlk. | 1 | - | - | 1 |
| *Pouteria grandiflora* (A.DC.) Baehni | 1 | - | - | 1 |
| *Pouteria torta* (Mart.) Radlk. | 9 | - | - | 9 |
| *Pradosia lactescens* (Vell.) Radlk. | 1 | - | - | 1 |
| **Violaceae** | **1** | **-** | **-** | **1** |
| *Paypayrola blanchetiana* | 1 | - | - | 1 |
| **Unidentified** | 12 |  | 4 | **16** |
| **General Total** | **190** | **15** | **59** | **267** |
