# Supplementary material
Source: Elsevier journal article supplement (https://www.sciencedirect.com/science/article/pii/S2530064421000547)
Supplement: mmc4 [file S2530064421000547:mmc4.docx]

**Table S4.** Simplification of Generalized Mixed Models (GLMM) and Akaike Criterion (AIC).

|  | **Density of logged trees** | **AIC** |
| --- | --- | --- |
| M1 | glmer (density ~ age + dist_trail + dist_edge + total_biomass + total_density + spp_richness_total + declivity + (1 | plot) + (1 | sample.unit), family = "poisson") | 201.11 |
| M2 | glmer (density ~ age + dist_edge + total_biomass + total_density + spp_richness_total + declivity + (1 | plot) + (1 | sample.unit), family = "poisson") | 199.11 |
| M3 | glmer (density ~ dist_edge + total_biomass + total_density + spp_richness_total + declivity + (1 | plot) + (1 | sample.unit), family = "poisson") | 199.46 |
|  | **Richness of logged trees** |  |
| M1 | glmer (richness ~ age + dist_trail + dist_edge + total_biomass + total_density + spp_richness_total + declivity + (1 | plot) + (1 | sample.unit), family = "poisson" | 152.07 |
| M2 | glmer (richness ~ age + dist_trail + dist_edge + Total_biomass + total_density + declivity + (1 | plot) + (1 | sample.unit), family = "poisson") | 150.21 |
| M3 | glmer (richness ~ age + dist_edge + total_biomass + total_density + declivity + (1 | plot) + (1 | sample.unit), family = "poisson") | 148.32 |
| M4 | glmer (richness ~ age + dist_edge + total_density + declivity + (1 | plot) + (1 | sample.unit), family = "poisson") | 147.81 |
| M5 | glmer (richness ~ age + dist_edge + total_density + (1 | plot) + (1 | sample.unit) , family = "poisson") | 145.90 |
| M6 | glmer (richness ~ age + dist_edge + (1 | plot) + (1 | sample.unit), family = "poisson") | 145.47 |
|  | **Biomass of logged trees** |  |
| M1 | lmer(biomass ~ age + dist_trail + dist_edge + total_biomass + total_density + spp_richness_total + declivity + (1 | plot) + (1 | sample.unit)) | 643.73 |
| M2 | lmer(biomass ~ dist_trail + dist_edge + total_biomass + total_density + spp_richness_total + declivity + (1 | plot) + (1 | sample.unit)) | 644.50 |

Variable meanings: dist_edge – distance to the nearest edge; dist_trail – distance to the nearest trail; total_biomass – biomass of living trees; total_density – total density of living trees; spp_richness_total – species richness of living trees; MF – Mature Forest; LSF – Late Secondary Forest; ESF – Early Secondary Forest.
