# Supplementary material
Source: Elsevier journal article supplement (https://www.sciencedirect.com/science/article/pii/S2530064421000547)
Supplement: mmc5 [file S2530064421000547:mmc5.docx]

**Table S5.** Results of the Moran's I for the models of density, richness and biomass and of GLS for density and biomasswith exponential correlation structure (better AIC), after models’ simplification, according to the methodology by Zuur et al. (2010).

**Moran's I**

| **Variable response** | **Moran's I** | | | |
| --- | --- | --- | --- | --- |
| **Observed** | **Expected** | **SD** | **p value** |
| Density | 0.17 | -0.03 | 0.09 | 0.03* |
| Richness | 0.11 | -0.03 | 0.09 | 0.11 |
| Biomass | 0.34 | -0.02 | 0.06 | < 0.05* |

**GLS**

| **Dependent variables** | **Fixed effects** | **Correlation**  **structure** | **Value** | **Std. Error** | **t value** | **p-value** |
| --- | --- | --- | --- | --- | --- | --- |
| Density of logged trees | Intercept (LSF) |  | 10.75 | 11.34 | 0.94 | 0.35 |
| MF |  | 11.26 | 9.6 | 1.17 | 0.25 |
| ESF |  | 2.93 | 9.35 | 0.31 | 0.75 |
| dist_trail |  | 0.99 | 4.39 | 0.22 | 0.82 |
| dist_edge | corExp | -5.78 | 3.99 | -1.45 | 0.16 |
| total_biomass |  | -1.77 | 2.97 | -0.59 | 0.55 |
| total_density |  | 2.05 | 4.27 | 0.48 | 0.63 |
| spp_richness_total |  | -0.25 | 0.32 | -0.78 | 0.44 |
| declivity |  | -0.27 | 2.19 | -0.12 | 0.90 |
| Biomass of logged trees | Intercept |  | 162.19 | 115.12 | 1.4 | 0.16 |
| dist_trail |  | -18.19 | 43.39 | -0.41 | 0.67 |
| dist_edge | corExp | -46.65 | 66.73 | -0.69 | 0.48 |
| total_biomass |  | 4.9 | 30.2 | 0.16 | 0.87 |
| total_density |  | 3.12 | 42.76 | 0.07 | 0.94 |
| spp_richness_total |  | -1.6 | 3.14 | -0.51 | 0.60 |

Variable meanings: dist_edge – distance to the nearest edge; dist_trail – distance to the nearest trail; total_biomass – biomass of living trees; total_density – total density of living trees; spp_richness_total – species richness of living trees.
